# Supplementary material for: Polymer decorated magnetite materials as smart protein separators to manipulate the high loading of heme proteins
Source: Royal Society of Chemistry journal article supplement (doi:10.1039/c5nj00677e), 2015-01-01
Supplement: c5nj00677e1.pdf [file c5nj00677e1.pdf]

1           **Polymer decorated magnetite materials as smart protein**  
2           **separators to manipulate the high loading of heme proteins**

3

4           Xue Xue<sup>a</sup>, Binghai Wang<sup>a</sup>, Xingjun Xi<sup>b</sup>, Qiao Chu<sup>b</sup>, Yun Wei<sup>a\*</sup>

5

6

7           Supporting information

8

9

10

11

12

13

14

15

16

17

## Adsorption data for Lysozyme

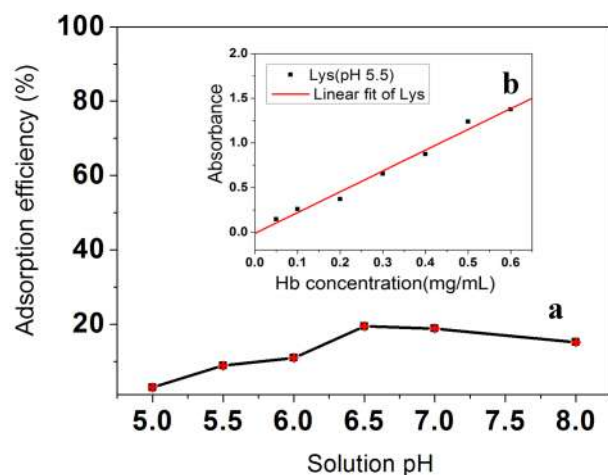

19

20 **Fig. S1** pH dependence of the adsorption efficiencies of 0.1 mg/mL protein (Lys) in 2 mL phosphate buffer (1/15  
21 mol/L, pH 5.0-8.0) by 3 mg PVIM-MMPs (a). Standard curves of Lys in the PBS (pH 5.5) (b).

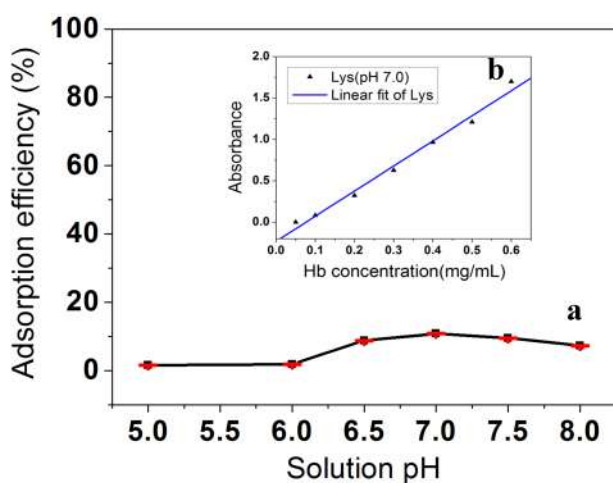

22

23 **Fig. S2** pH dependence of the adsorption efficiencies of 0.1 mg/mL protein (Lys) in 2 mL phosphate buffer (1/15  
24 mol/L, pH 5.0-8.0) by 3 mg PVIM-MNPs (a). Standard curves of Lys in the PBS (pH 7.0) (b).

25

26 Seen from Fig. 4 in the manuscript, for PVIM-MMPs, the maximum adsorption efficiency was  
27 achieved at pH 5.5 (Fig. 4-a), while pH 7.0 for PVIM-MNPs (Fig. 4-b). After treated with PVIM-  
28 MNPs, the Lys adsorption efficiency can be seen from above figures (Fig. S1-a and Fig. S2-a). We  
29 calculated the adsorbed amount ( $q$ ) of Lys on single component toward PVIM-MMPs and PVIM-

30 MNPs with the support of standard curves of Lys ( Fig. S1-b and Fig. S2-b). And the q of Lys  
31 towards PVIM-MMPs is 0.042 mg/mg, and towards PVIM-MNPs is 0.006 mg/mg.
